# Supplementary material for: Distribution in Rat Blood and Brain of TDMQ20, a Copper Chelator Designed as a Drug-Candidate for Alzheimer’s Disease
Source: MDPI journal article supplement (doi:10.3390/pharmaceutics14122691), 2022-12-01
Supplement: s1 [file s1]

## Distribution in rat blood and brain of TDMQ20, a copper chelator designed as a drug-candidate for Alzheimer's disease.

Lan Huang,<sup>1</sup> Yaoxun Zeng,<sup>2</sup> Yongliang Li,<sup>1</sup> Yingshan Zhu,<sup>1</sup> Yan He,<sup>2</sup> Yan Liu,<sup>1\*</sup> Anne Robert,<sup>3</sup> Bernard Meunier<sup>1,3\*</sup>

1) School of Chemical Engineering and Light Industry, Guangdong University of Technology, Guangzhou 510006, China.

2) School of Biomedical and Pharmaceutical Sciences, Guangdong University of Technology, Guangzhou 510006, China.

3) Laboratoire de Chimie de Coordination du CNRS (LCC-CNRS), Inserm ERL 1289, 205 route de Narbonne, 31077 Toulouse, France.

### Supplementary Material

#### *LC-MS/MS method*

**Table S1.** HPLC analyses: Mobile phase composition and gradient elution table. Eluents: (A) 0.1% formic acid in water, (B) methanol; Flow rate: 0.3 mL/min; Column temperature: 40 °C; Injection volume: 1 µL.

**Table S2.** Mass spectrometry parameters.

**Table S3.** Fragmentation used in MRM mode.

#### *Description and validation of TDMQ20 quantification method*

**Figure S1.** (a) MS/MS Spectrum of TDMQ20 ( $m/z = 327.3$ ,  $MH^+$ ). (b) Structures of TDMQ20 fragments ( $m/z = 239.2$  and  $204.2$ ).

**Figure S2.** Calibration curves of TDMQ20 concentration in rat plasma (a) and in rat brain (b), constructed by comparing the peak area ratio of TDMQ20/IS (Y) against TDMQ20 concentration (X) using least squares linear regression method with 1/X weighting. Y is calculated as area of the transition  $327.3 \rightarrow 239.2$  of TDMQ20 divided by the area of transition  $189.1 \rightarrow 143.2$  of IS.

**Figure S3.** MRM Chromatograms of transitions  $m/z 327.1 \rightarrow 239.1$  representative of TDMQ20 (a) or transition  $m/z 189.1 \rightarrow 143.1$  representative of IS (b) in (A) blank plasma, (B) blank plasma spiked with TDMQ20 (10 ng/mL) and IS (2000 ng/mL), (C) rat plasma sample 1.0 h after oral administration of TDMQ20 (25 mg/kg) The retention times of TDMQ20 and IS are 3.71 min and 3.86 min, respectively.

**Figure S4.** MRM Chromatograms of transitions  $m/z 327.1 \rightarrow 239.1$  representative of TDMQ20 (a) or transition  $m/z 189.1 \rightarrow 143.1$  representative of IS (b) in (A) blank rat brain homogenate, (B) blank rat brain homogenate spiked with TDMQ20 (10 ng/mL) and IS (8000 ng/mL), (C) rat brain sample 2.0 h after oral administration of TDMQ20 (25 mg/kg). The retention times of TDMQ20 and IS were 3.71 min and 3.86 min, respectively.

**Table S4.** Intra-day and inter-day accuracy and precision of TDMQ20 ( $n = 5$ ).

**Table S5.** Extraction recovery and matrix effect of TDMQ20 in rat plasma and brain homogenate.

**Table S6.** Stability data of TDMQ20 in rat plasma and brain homogenate.

#### *Dosage of TDMQ20 in rat plasma and brain after intravenous or oral administration*

**Table S7.** TDMQ20 concentration in plasma (ng/mL) after intravenous administration at 2.5 mg/kg.

**Table S8.** TDMQ20 concentration in plasma (ng/mL) after oral administration at 25 mg/kg.

**Table S9.** TDMQ20 concentration in brain extracts (ng/g) after oral administration at 25 mg/kg.

### ***LC-MS/MS method***

**Table S1.** HPLC analyses: Mobile phase composition and gradient elution table. Eluents: (A) 0.1% formic acid in water, (B) methanol; Flow rate: 0.3 mL/min; Column temperature: 40 °C; Injection volume: 1 µL.

| Time (min) | %A | %B |
|------------|----|----|
| 0          | 90 | 10 |
| 1          | 90 | 10 |
| 3          | 10 | 90 |
| 6          | 10 | 90 |
| 6.1        | 90 | 10 |
| 8          | 90 | 10 |

**Table S2.** Mass spectrometry parameters.

| Mass spectrum parameters |                    |
|--------------------------|--------------------|
| Ionization mode          | H-ESI <sup>+</sup> |
| Spray Voltage/V          | 3500               |
| Vaporizer Temperature/°C | 350                |
| Capillary Temperature/°C | 320                |
| Sheath Gas/Arb           | 35                 |
| AUX Gas/Arb              | 10                 |
| Sweep Gas/Arb            | 0                  |

**Table S3.** Fragmentation used in MRM mode.

| Compound | Polarity | Precursor<br>( <i>m/z</i> ) | Fragment<br>( <i>m/z</i> ) | Collision Energy<br>(V) | RF Lens<br>(V) |
|----------|----------|-----------------------------|----------------------------|-------------------------|----------------|
| TDMQ20   | +        | 327.11                      | 239.06                     | 16.32                   | 93             |
|          | +        | 327.11                      | 204.04                     | 39.58                   | 93             |
| IS       | +        | 189.07                      | 143.17                     | 21.48                   | 100            |
|          | +        | 189.07                      | 128.17                     | 36.44                   | 100            |

## Description and validation of TDMQ20 quantification method

**Figure S1. (a)** MS/MS Spectrum of TDMQ20 ( $m/z = 327.3$ ,  $MH^+$ ). **(b)** Structures of TDMQ20 fragments ( $m/z = 239.2$  and  $204.2$ ).

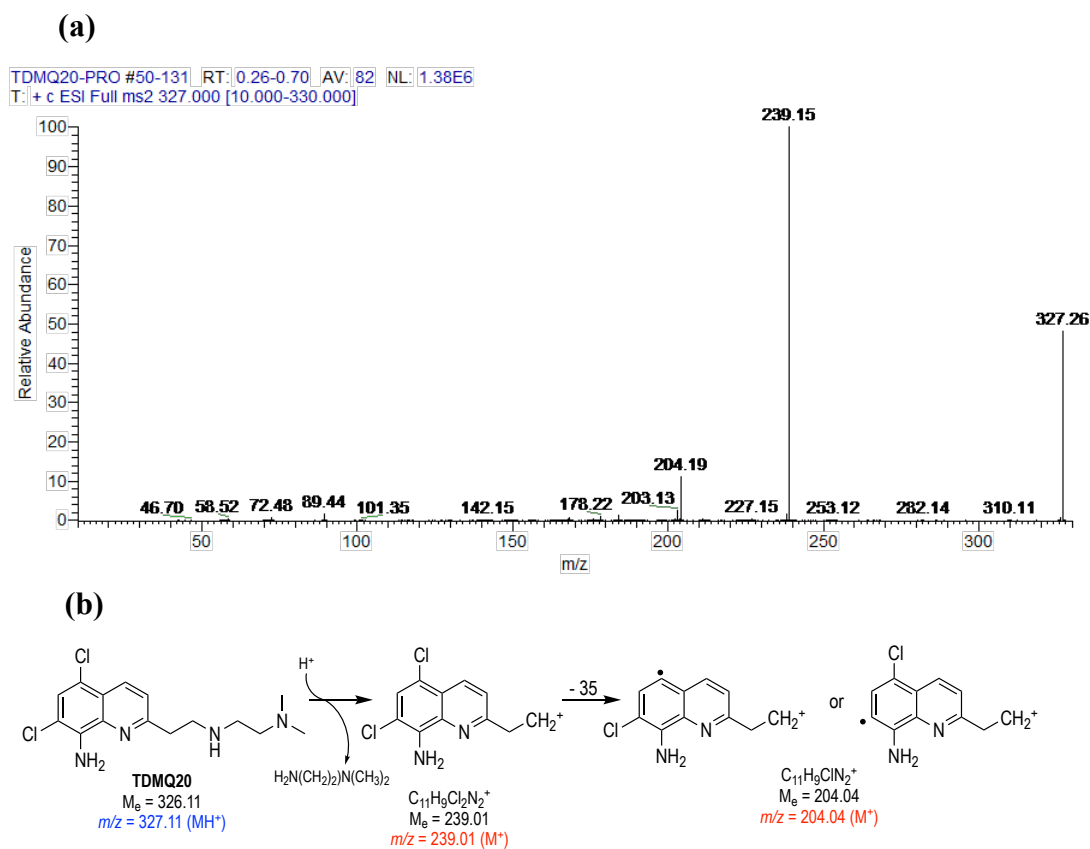

**Figure S2.** Calibration curves of TDMQ20 concentration in rat plasma **(a)** and in rat brain **(b)**, constructed by comparing the peak area ratio of TDMQ20/IS (Y) against TDMQ20 concentration (X) using least squares linear regression method with 1/X weighting. Y is calculated as area of the transition 327.3 → 239.2 of TDMQ20 divided by the area of transition 189.1 → 143.2 of IS.

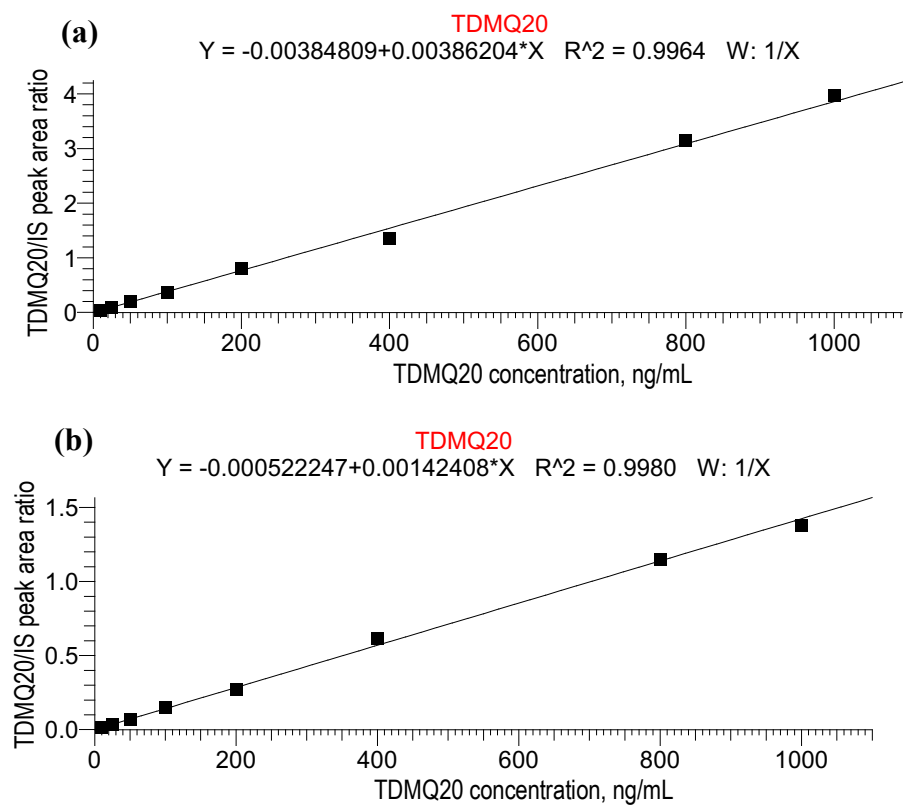

**Figure S3.** MRM Chromatograms of transitions  $m/z$  327.1  $\rightarrow$  239.1 representative of TDMQ20 (a) or transition  $m/z$  189.1  $\rightarrow$  143.1 representative of IS (b) in (A) blank plasma, (B) blank plasma spiked with TDMQ20 (10 ng/mL) and IS (2000 ng/mL), (C) rat plasma sample 1.0 h after oral administration of TDMQ20 (25 mg/kg) The retention times of TDMQ20 and IS are 3.71 min and 3.86 min, respectively.

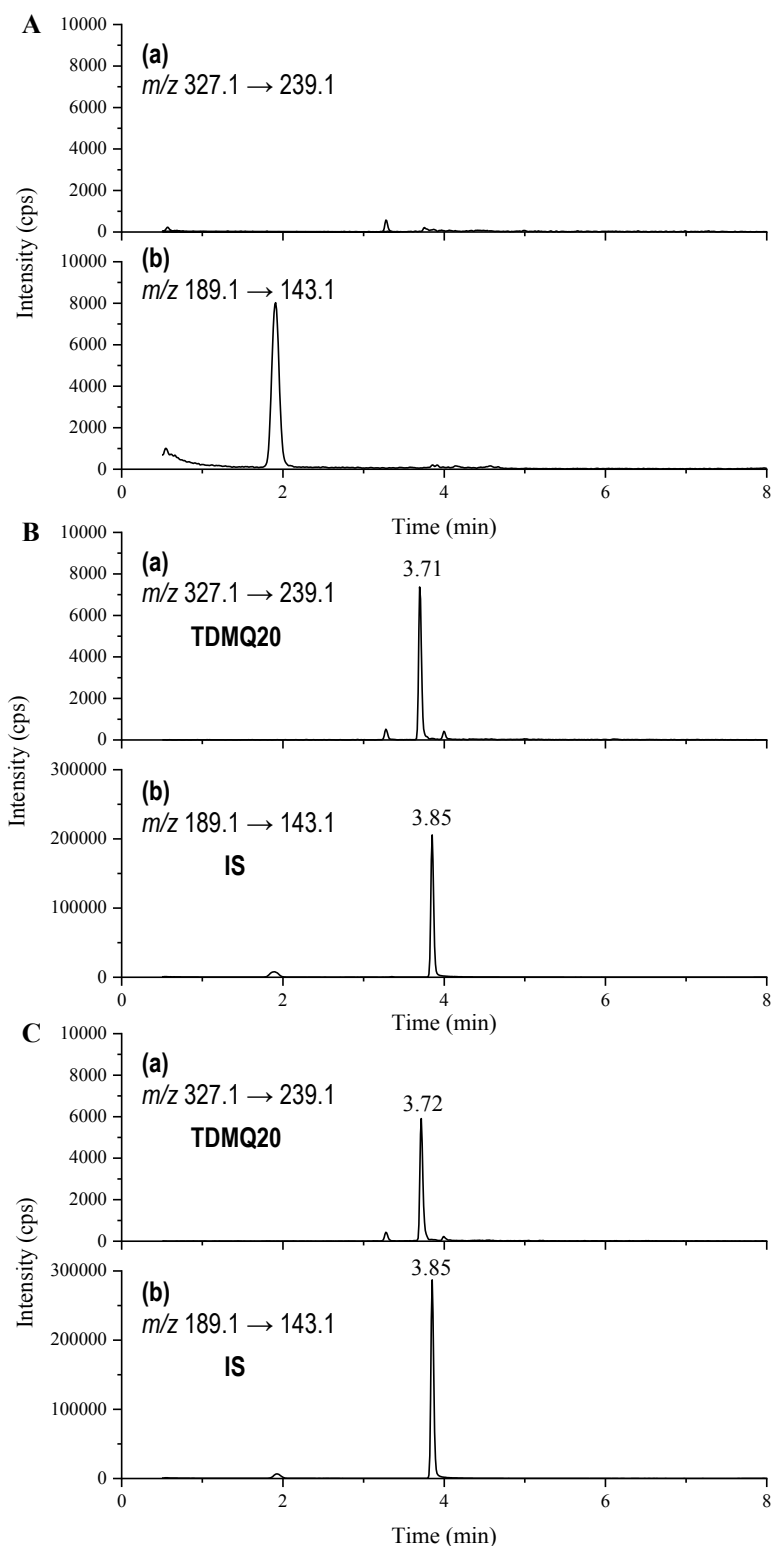

**Figure S4.** MRM Chromatograms of transitions  $m/z$  327.1  $\rightarrow$  239.1 representative of TDMQ20 (**a**) or transition  $m/z$  189.1  $\rightarrow$  143.1 representative of IS (**b**) in (A) blank rat brain homogenate, (B) blank rat brain homogenate spiked with TDMQ20 (10 ng/mL) and IS (8000 ng/mL), (C) rat brain sample 2.0 h after oral administration of TDMQ20 (25 mg/kg). The retention times of TDMQ20 and IS were 3.71 min and 3.86 min, respectively.

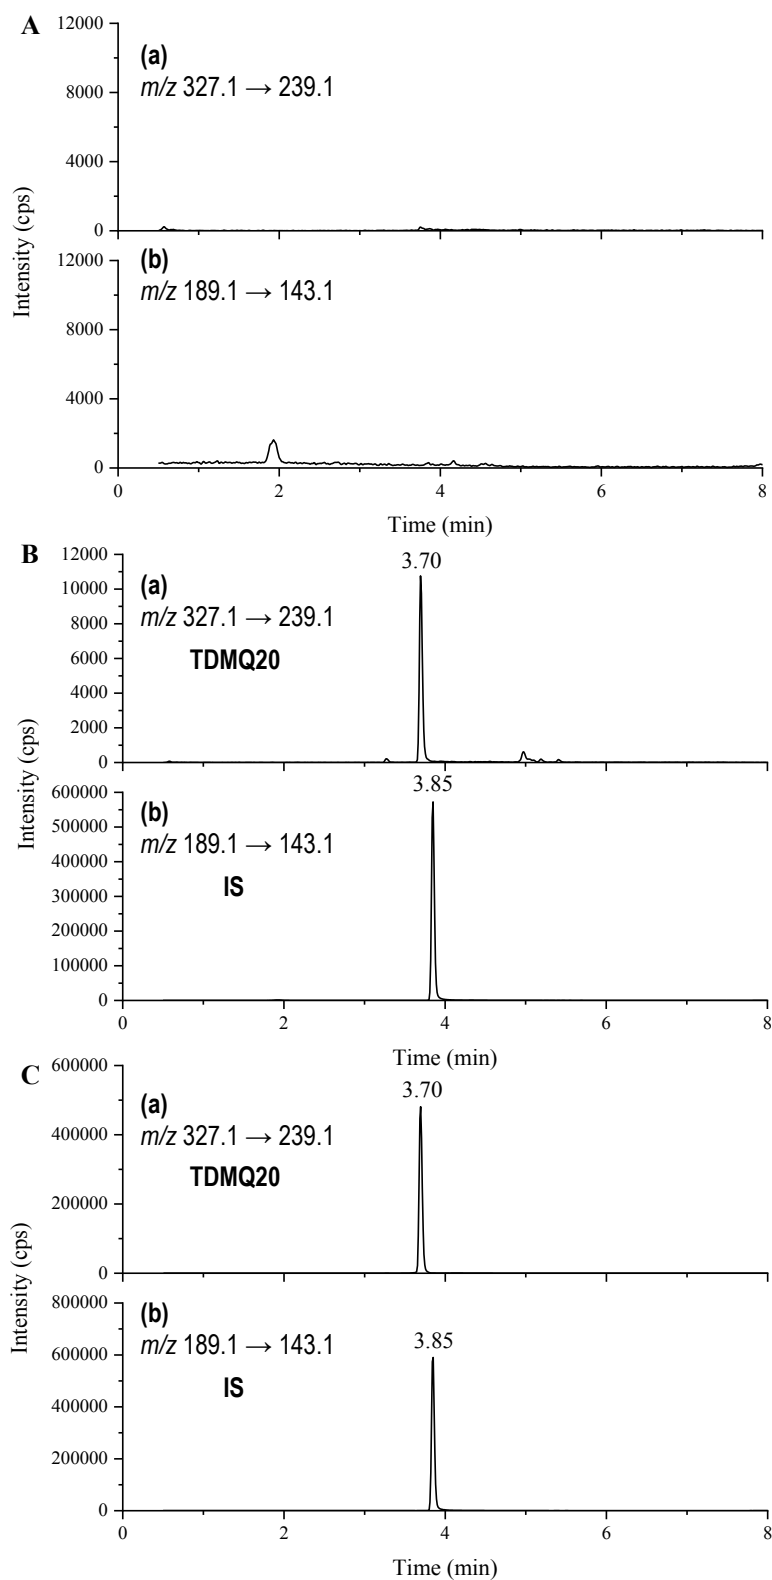

**Table S4.** Intra-day and inter-day accuracy and precision of TDMQ20 (n = 5).

| Matrix | Spiked conc.<br>(ng/mL) | Intra-day                 |                                |                    | Inter-day                 |                                |                    |
|--------|-------------------------|---------------------------|--------------------------------|--------------------|---------------------------|--------------------------------|--------------------|
|        |                         | Measured conc.<br>(ng/mL) | Accuracy<br>(RE%) <sup>a</sup> | Precision<br>(CV%) | Measured conc.<br>(ng/mL) | Accuracy<br>(RE%) <sup>a</sup> | Precision<br>(CV%) |
| Plasma | 10                      | 9.7                       | -2.7                           | 13.2               | 11.0                      | 10.2                           | 14.5               |
|        | 25                      | 23.9                      | -4.5                           | 3.1                | 24.2                      | -3.4                           | 4.7                |
|        | 500                     | 496.6                     | -0.7                           | 3.3                | 507.3                     | 1.5                            | 5.3                |
|        | 750                     | 751.9                     | 0.3                            | 4.4                | 767.9                     | 2.4                            | 5.8                |
| Brain  | 10                      | 10.3                      | 3.2                            | 8.8                | 10.8                      | 8.0                            | 9.1                |
|        | 25                      | 24.3                      | -2.8                           | 3.1                | 24.8                      | -0.8                           | 3.2                |
|        | 500                     | 480.1                     | -4.0                           | 3.3                | 499.4                     | -0.1                           | 4.2                |
|        | 750                     | 708.1                     | -5.6                           | 4.4                | 721.1                     | -4.4                           | 4.3                |

<sup>a</sup>RE% = (Measured concentration - Spiked concentration) / Spiked concentration × 100

**Table S5.** Extraction recovery and matrix effect of TDMQ20 in rat plasma and brain homogenate.

| Matrix | Spiked conc.<br>(ng/mL) | Extraction recovery (%) | RSD (%) | Matrix effect (%) | RSD (%) |
|--------|-------------------------|-------------------------|---------|-------------------|---------|
| Plasma | 25                      | 95.7                    | 3.6     | 100.6             | 5.0     |
|        | 500                     | 93.7                    | 7.6     | 96.9              | 5.7     |
|        | 750                     | 97.6                    | 3.3     | 97.7              | 2.8     |
| Brain  | 25                      | 91.1                    | 3.3     | 108.8             | 3.9     |
|        | 500                     | 93.7                    | 2.7     | 98.6              | 2.9     |
|        | 750                     | 94.5                    | 1.9     | 102.9             | 0.9     |

**Table S6.** Stability data of TDMQ20 in rat plasma and brain homogenate.

| Matrix | Spiked conc.<br>(ng/mL) | Room temperature for 4h |        | Storage at 4°C for 24h |        | Three freeze-thaw cycles |        | Storage at -20°C for 14 days |        |
|--------|-------------------------|-------------------------|--------|------------------------|--------|--------------------------|--------|------------------------------|--------|
|        |                         | RE(%) <sup>a</sup>      | RSD(%) | RE(%) <sup>a</sup>     | RSD(%) | RE(%) <sup>a</sup>       | RSD(%) | RE(%) <sup>a</sup>           | RSD(%) |
| Plasma | 25                      | -1.7                    | 2.4    | 1.1                    | 3.6    | -1.6                     | 5.1    | -6.5                         | 4.4    |
|        | 750                     | 1.4                     | 5.0    | 4.7                    | 1.5    | 6.5                      | 3.3    | 6.5                          | 3.3    |
| Brain  | 25                      | -3.9                    | 3.1    | 1.9                    | 2.1    | 5.7                      | 3.2    | 3.0                          | 3.6    |
|        | 750                     | -6.8                    | 5.6    | -7.0                   | 1.2    | -6.5                     | 0.8    | -3.7                         | 0.3    |

<sup>a</sup>RE% = (Measured concentration - Spiked concentration) / Spiked concentration × 100

***Dosage of TDMQ20 in rat plasma and brain after intravenous or oral administration***

**Table S7.** TDMQ20 concentration in plasma (ng/mL) after intravenous administration at 2.5 mg/kg.

***Individual data***

| Time<br>(min) | Female |     |     |     |     |     |      |     |
|---------------|--------|-----|-----|-----|-----|-----|------|-----|
|               | 1f     | 2f  | 3f  | 4f  | 5f  | 6f  | Mean | SEM |
| 2             | 194    | 153 | 148 | 169 | 167 | 216 | 175  | 11  |
| 5             | 104    | 98  | 159 | 144 | 112 | 166 | 130  | 12  |
| 10            | 109    | 100 | 143 | 99  | 69  | 92  | 102  | 10  |
| 30            | 70     | 87  | 84  | 91  | 46  | 59  | 73   | 7   |
| 60            | 47     | 55  | 56  | 72  | 61  | 81  | 62   | 5   |
| 90            | 64     | 35  | 31  | 37  | 28  | 56  | 42   | 6   |
| 120           | 53     | 33  | 75  | 43  | 28  | 13  | 41   | 9   |
| 180           | 26     | 28  | 35  | 34  | 26  | 25  | 29   | 2   |
| 300           | 32     | 16  | 31  | 43  | 38  | 34  | 32   | 4   |
| Time<br>(min) | Male   |     |     |     |     |     |      |     |
|               | 1m     | 2m  | 3m  | 4m  | 5m  | 6m  | Mean | SEM |
| 2             | 116    | 190 | 137 | -   | 216 | 69  | 146  | 24  |
| 5             | 89     | 151 | 105 | 146 | 162 | 71  | 121  | 15  |
| 10            | 95     | 121 | 92  | 96  | 150 | 70  | 104  | 11  |
| 30            | 62     | 97  | 96  | 62  | 88  | 67  | 79   | 7   |
| 60            | 64     | 74  | 47  | 40  | 47  | 47  | 53   | 5   |
| 90            | 57     | 74  | 44  | 48  | 55  | 42  | 53   | 5   |
| 120           | 56     | 29  | 23  | 24  | 35  | 34  | 33   | 5   |
| 180           | 52     | 22  | 24  | 22  | 27  | 37  | 31   | 5   |
| 300           | 25     | 16  | 11  | 17  | 19  | 15  | 17   | 2   |



**Table S8.** TDMQ20 concentration in plasma (ng/mL) after oral administration at 25 mg/kg.**Individual data**

| Time (min) | Females |      |      |      |      |     |      |     |
|------------|---------|------|------|------|------|-----|------|-----|
|            | 1f      | 2f   | 3f   | 4f   | 5f   | 6f  | Mean | SEM |
| 10         | 546     | 591  | 376  | 632  | 316  | 184 | 441  | 72  |
| 20         | 766     | 1064 | 572  | 998  | 648  | 318 | 728  | 113 |
| 30         | 1322    | 1576 | 839  | 1276 | 676  | 590 | 1047 | 163 |
| 60         | 1580    | 1567 | 1287 | 1198 | 1062 | 727 | 1237 | 132 |
| 120        | 772     | 673  | 634  | 606  | 500  | 398 | 597  | 54  |
| 180        | 338     | 243  | 272  | 305  | 185  | 153 | 249  | 29  |
| 300        | 106     | 61   | 129  | 80   | 46   | 67  | 82   | 13  |
| 480        | 66      | 32   | 103  | 57   | 54   | 62  | 62   | 9   |
| 720        | 33      | 23   | 30   | 40   | 20   | 19  | 27   | 3   |
| Time (min) | Males   |      |      |      |      |     |      |     |
|            | 1m      | 2m   | 3m   | 4m   | 5m   | 6m  | Mean | SEM |
| 10         | 295     | 355  | 192  | 262  | 334  | 562 | 333  | 51  |
| 20         | 520     | 604  | 491  | 511  | 608  | 835 | 595  | 52  |
| 30         | 650     | 655  | 806  | 721  | 812  | 785 | 738  | 74  |
| 60         | 870     | 619  | 804  | 999  | 642  | 613 | 758  | 65  |
| 120        | 276     | 245  | 291  | 136  | 180  | 213 | 223  | 24  |
| 180        | 150     | 196  | 142  | 62   | 49   | 145 | 124  | 23  |
| 300        | 71      | 125  | 66   | 51   | 73   | 126 | 85   | 13  |
| 480        | 47      | 68   | 47   | 28   | 34   | 42  | 44   | 6   |
| 720        | 17      | 26   | 17   | 10   | 12   | 14  | 16   | 2   |

**Table S9.** TDMQ20 concentration in brain extracts (ng/g) after oral administration at 25 mg/kg.**Individual data**

| Time (h) | Females                      |      |      |      |      |      |      | Mean | SEM |
|----------|------------------------------|------|------|------|------|------|------|------|-----|
|          |                              |      |      |      |      |      |      |      |     |
| 3        | 564                          | 199  | 520  | 1354 | 1007 | 479  | 687  | 170  |     |
| 5        | 1099                         | 828  | 717  | 826  | 441  | 868  | 797  | 88   |     |
| 7        | 505                          | 1768 | 1996 | 1754 | 1025 | 1039 | 1348 | 236  |     |
| Time (h) | Males                        |      |      |      |      |      |      | Mean | SEM |
|          |                              |      |      |      |      |      |      |      |     |
| 3        | 291                          | 543  | 363  | 143  | 333  | 248  | 320  | 54   |     |
| 5        | 1138                         | 863  | 511  | 803  | 1017 | 671  | 834  | 93   |     |
| 7        | 554                          | 1009 | 731  | 763  | 807  | 1040 | 817  | 74   |     |
| 12       | 1111                         | 1171 | 856  | 938  | 1010 | 771  | 976  | 62   |     |
| 24       | 810                          | 912  | 1006 | 1001 | 883  | 908  | 920  | 30   |     |
| 48       | 514                          | 321  | 467  | 514  | 478  | 341  | 439  | 35   |     |
| Time (h) | Males + Females 1/1 (n = 12) |      |      |      |      |      |      | Mean | SEM |
|          |                              |      |      |      |      |      |      |      |     |
| 3        |                              |      |      |      |      |      | 504  |      |     |
| 5        |                              |      |      |      |      |      | 816  |      |     |
| 7        |                              |      |      |      |      |      | 1083 |      |     |

Note. Three hours after TDMQ20 oral administration, [TDMQ20] in plasma was 249 ng/mL and 124 ng/mL for females and males, respectively (Figure 3, Table S8). At 3 h, [TDMQ20] in brain was 687 ng/g and 320 ng/g (Figure 4, Table S9). The ng/g unit can be considered roughly

equivalent to ng/mL. Consequently, the brain-plasma concentration ratios were similar for females and males, with values =  $687/249 = 2.8$  and  $320/124 = 2.6$  at 3 h, for females and males, respectively. Calculated at C<sub>max</sub> (ca. 12.8 h for brain and 0.6 h for plasma), the brain/plasma concentration ratio for male rats was  $[TDMQ20]_{\text{brain}, 12.8 \text{ h}} / [TDMQ20]_{\text{plasma}, 0.6 \text{ h}} = 1100/830 = 1.3$ .

---
